# Supplementary material for: Biomedical Applications of Scutellaria edelbergii Rech. f.: In Vitro and In Vivo Approach
Source: MDPI journal article supplement (doi:10.3390/molecules26123740), 2021-06-19
Supplement: s1 [file s1]

## Supplementary Material

# Biomedical Applications of *Scutellaria edelbergii* Rech. f.: In Vitro and in Vivo Approach

Muddaser Shah <sup>1,2</sup>, Waheed Murad <sup>1,\*</sup>, Najeeb Ur Rehman <sup>2,\*</sup>, Sobia Ahsan Halim <sup>2</sup>, Manzoor Ahmed <sup>3</sup>,  
Hazir Rehman <sup>4</sup>, Muhammed Zahoor <sup>5</sup>, Sidra Mubin <sup>6</sup>, Ajmal Khan <sup>2</sup>, Mohamed A. Nassan <sup>7</sup>,  
Gaber El-Saber Batiha <sup>8</sup> and Ahmed Al-Harrasi <sup>2,\*</sup>

<sup>1</sup> Department of Botany, Abdul Wali Khan University Mardan, Mardan 23200, Pakistan;  
muddasersshah@awkum.edu.pk

<sup>2</sup> Natural and Medical Sciences Research Center, University of Nizwa, P.O. Box 33, Birkat Al  
Mauz 616, Nizwa, Oman; sobia\_halim@unizwa.edu.om (S.A.H.);  
ajmalkhan@unizwa.edu.om (A.K.)

<sup>3</sup> Department of Chemistry, University of Malakand, Chakdara 18800, Pakistan;  
manzoorhej@yahoo.com

<sup>4</sup> Department of Microbiology, Abdul Wali Khan University Mardan, Mardan 23200,  
Pakistan;  
hazirrahman@awkum.edu.pk

<sup>5</sup> Department of Biochemistry, University of Malakand, Chakdara 18800, Pakistan;  
mohammadzahoorus@yahoo.com

<sup>6</sup> Department of Botany, Hazara University Mansehra, Mansehra 21310, Pakistan;  
shahhu123@gmail.com

<sup>7</sup> Department of Clinical Laboratory Sciences, Turabah University College, Taif University,  
P.O. Box 11099,  
Taif 21944, Saudi Arabia; m.nassan@tu.edu.sa

<sup>8</sup> Department of Pharmacology and Therapeutics, Faculty of Veterinary Medicine,  
Damanhour University, Damanhour 22511, Egypt; gaberbatiha@gmail.com

\* Correspondence: waheedmurad@awkum.edu.pk (W.M.); najeeb@unizwa.edu.om (N.U.R.);  
aharrasi@unizwa.edu.om (A.A.-H.)

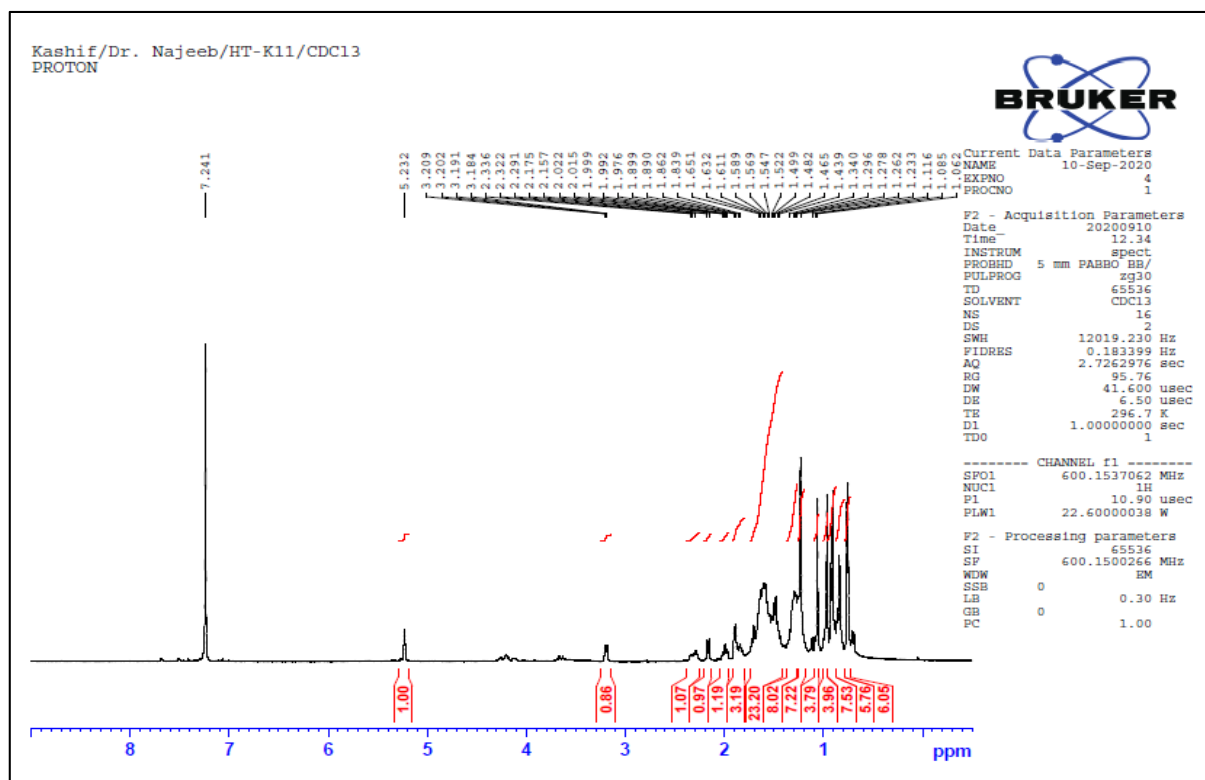

Figure S1:  $^1\text{H}$ -NMR of compound UA

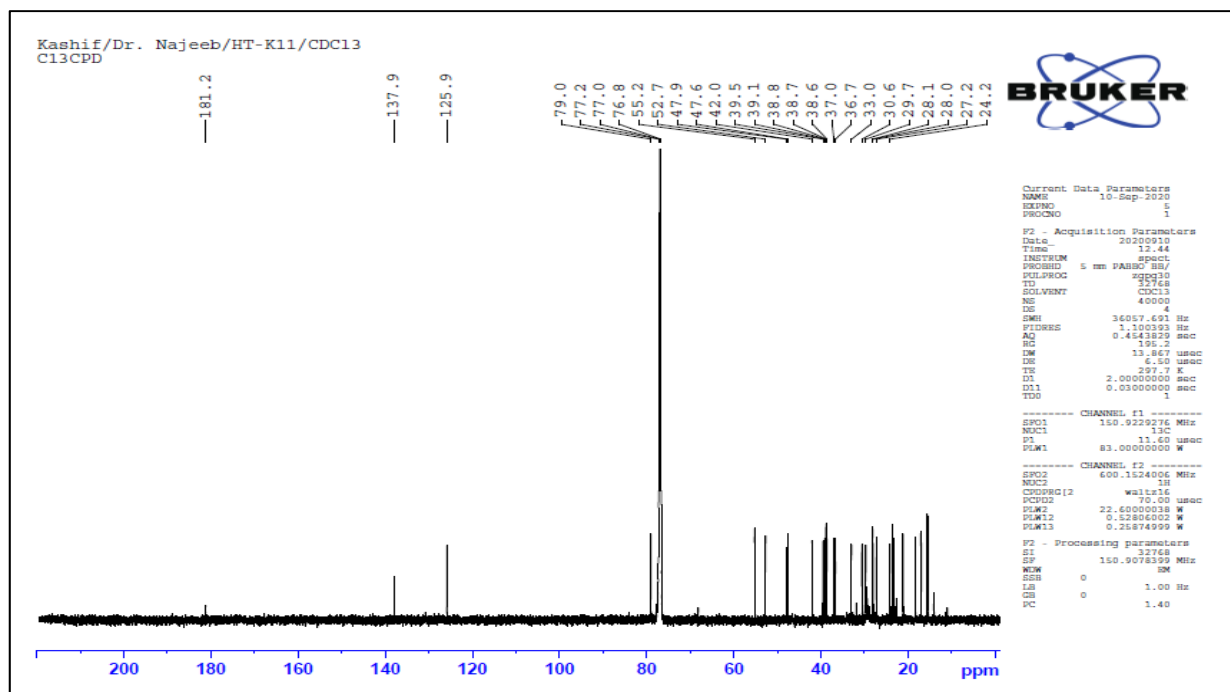

Figure S2:  $^{13}\text{C}$ -NMR of compound UA

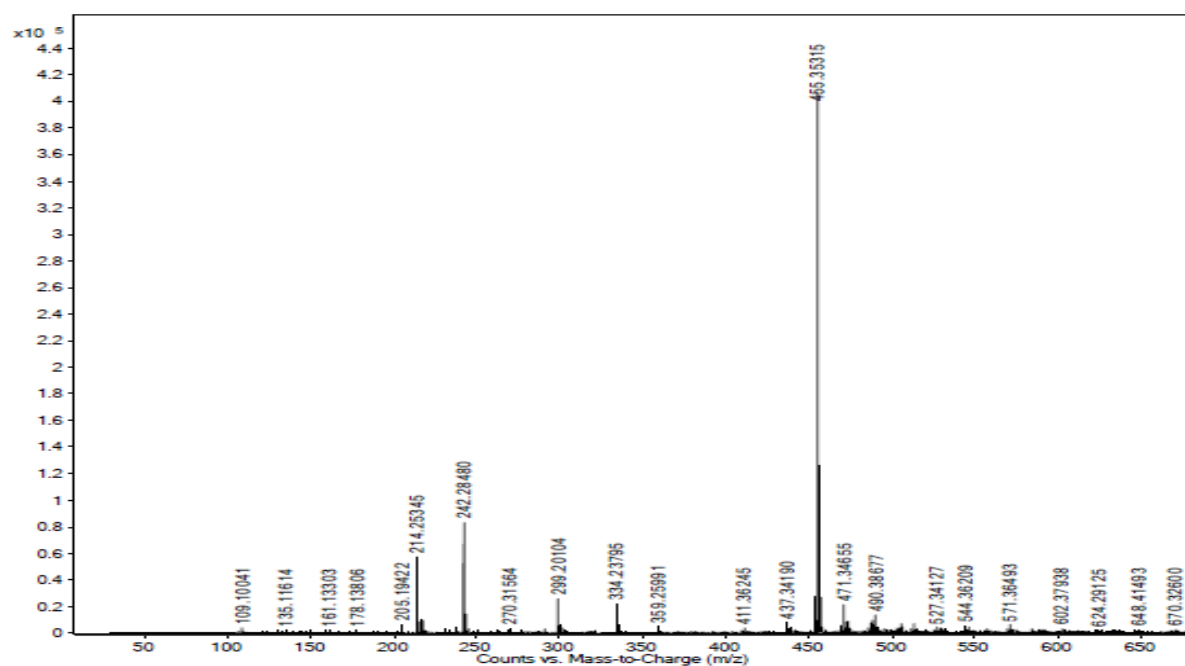

Figure S3: ESI-HRMS of UA

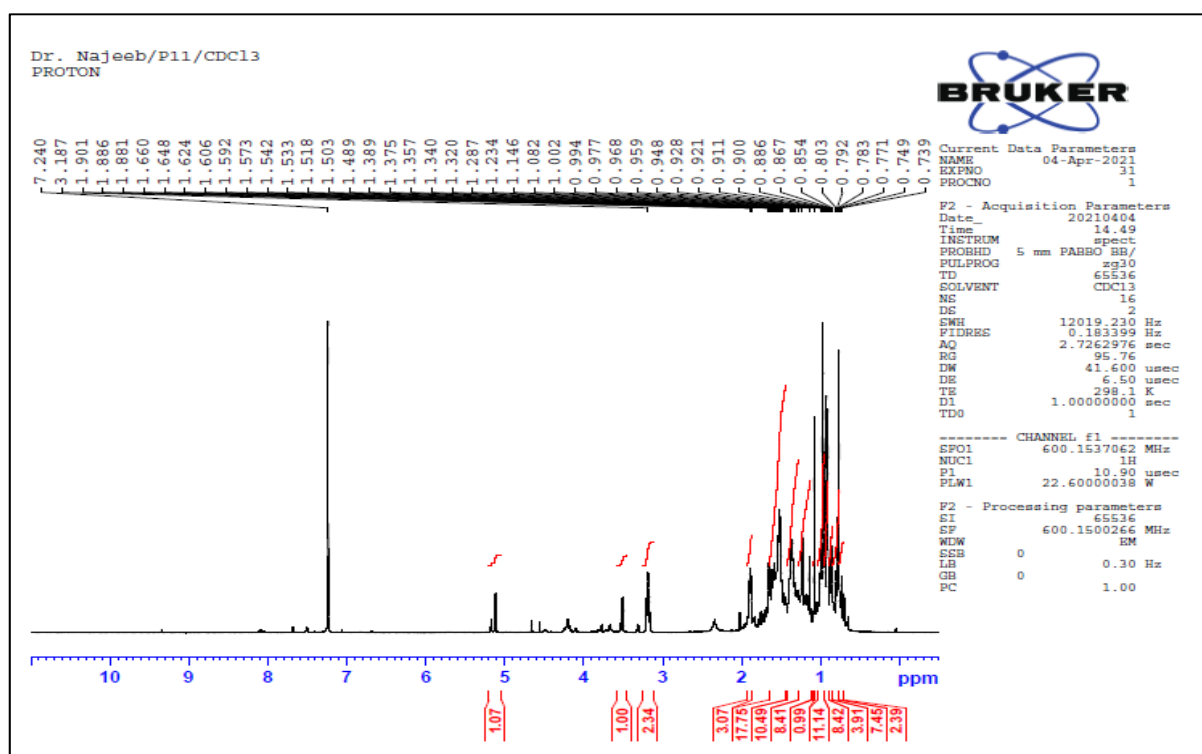

Figure S4: <sup>1</sup>H-NMR of compound OV

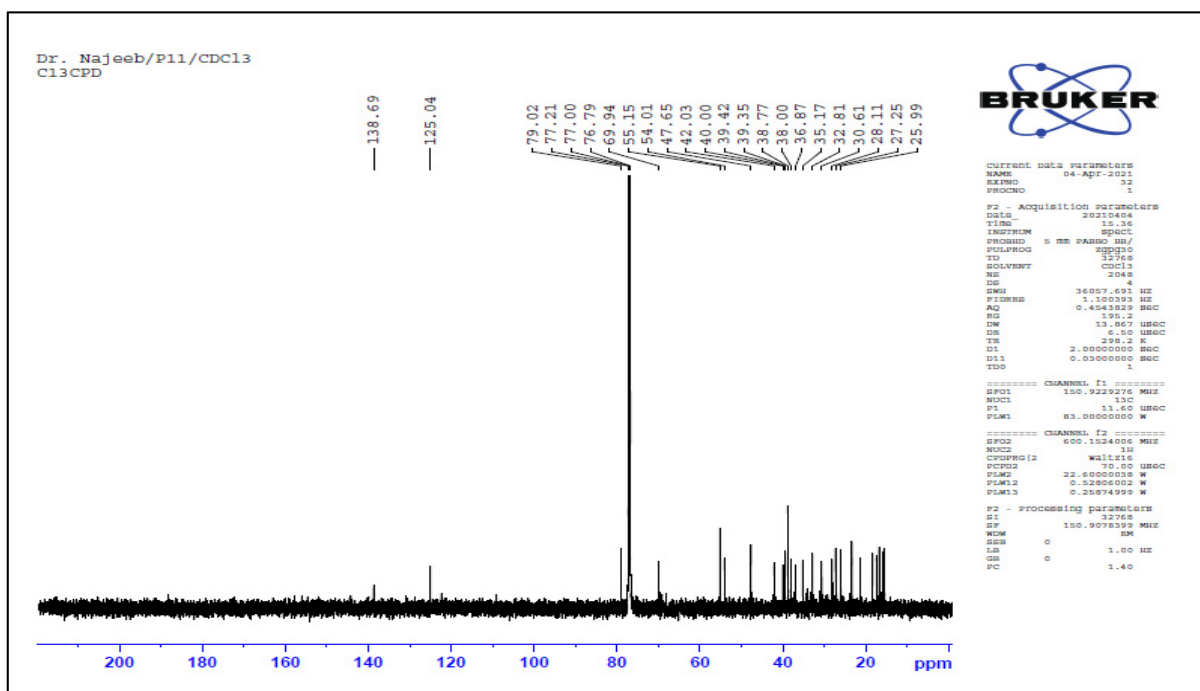

Figure S5: <sup>13</sup>C-NMR of compound OV

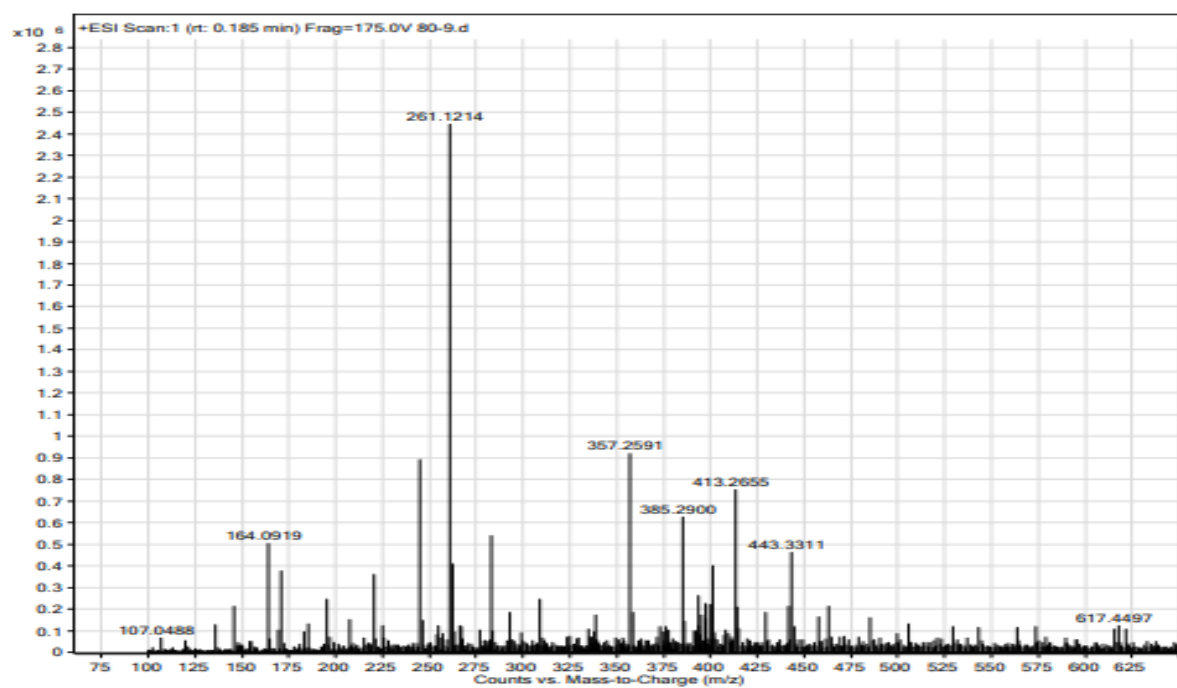

Figure S6: ESI-HRMS of OV

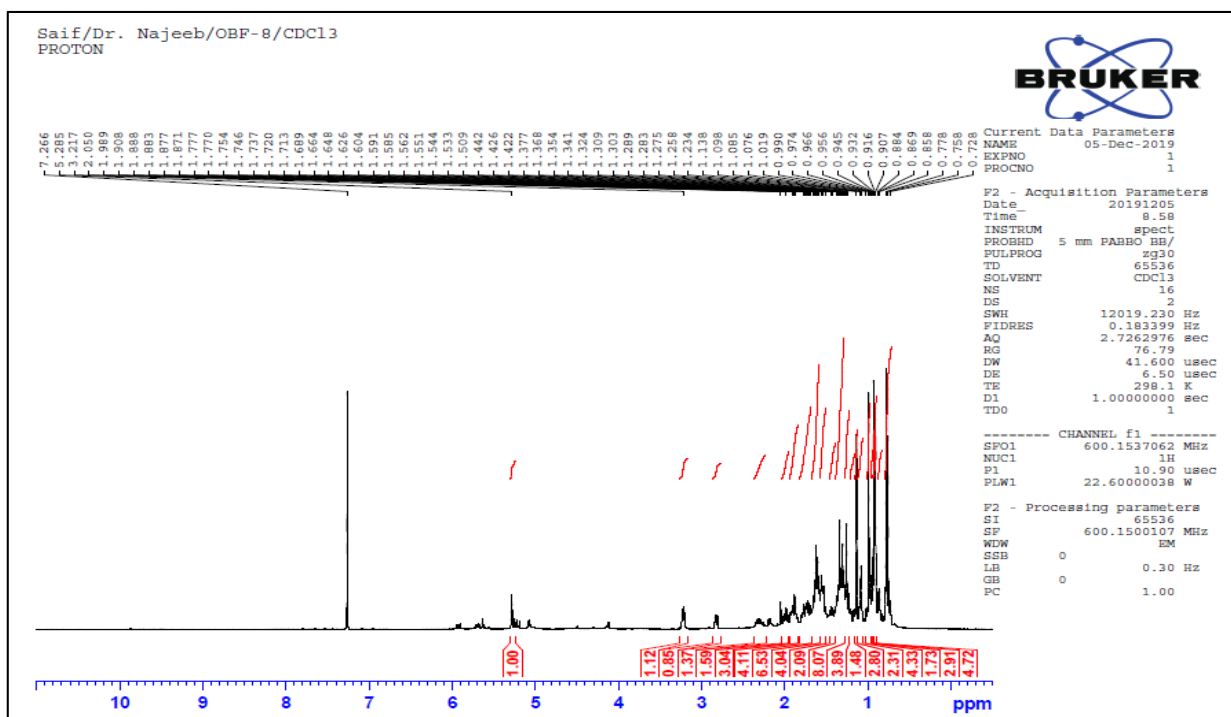

Figure S7:  $^1\text{H}$ -NMR of compound OA

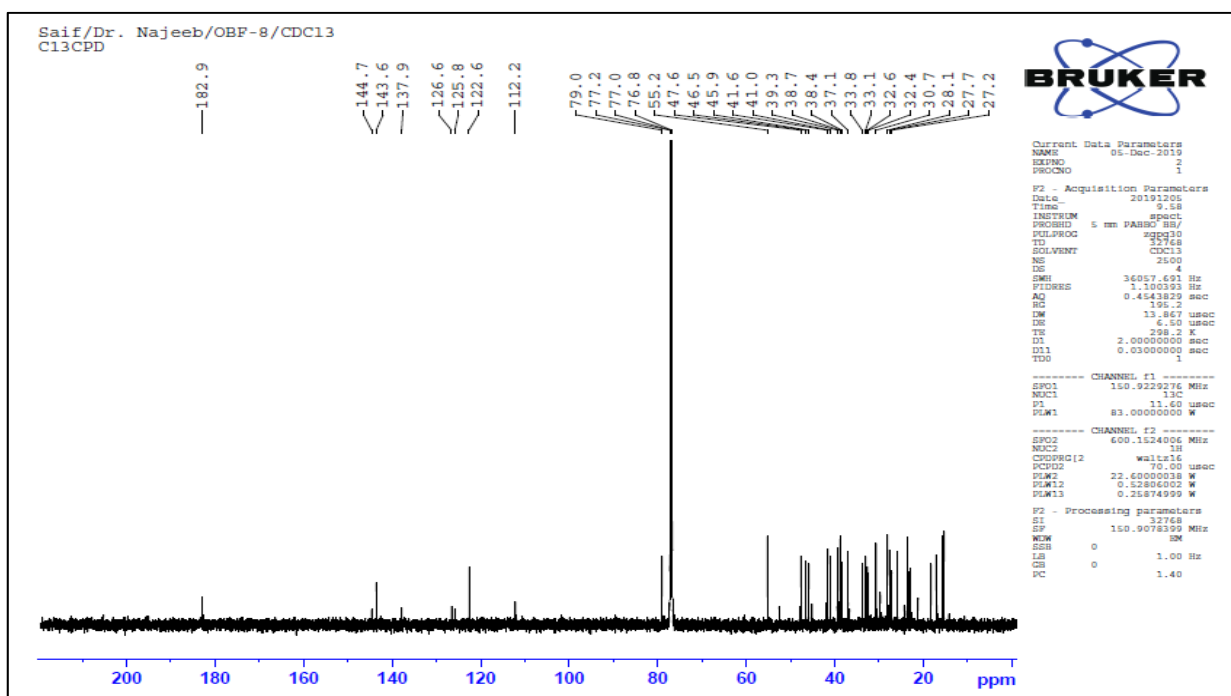

Figure S8:  $^{13}\text{C}$ -NMR of compound OA

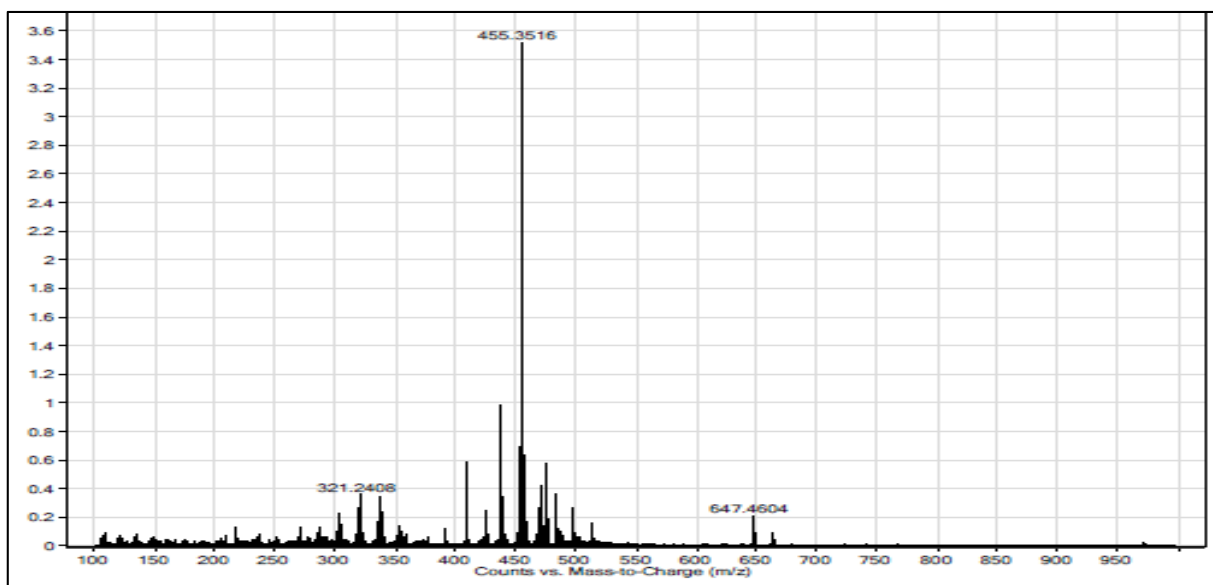

Figure S9: ESI-HRMS of OA

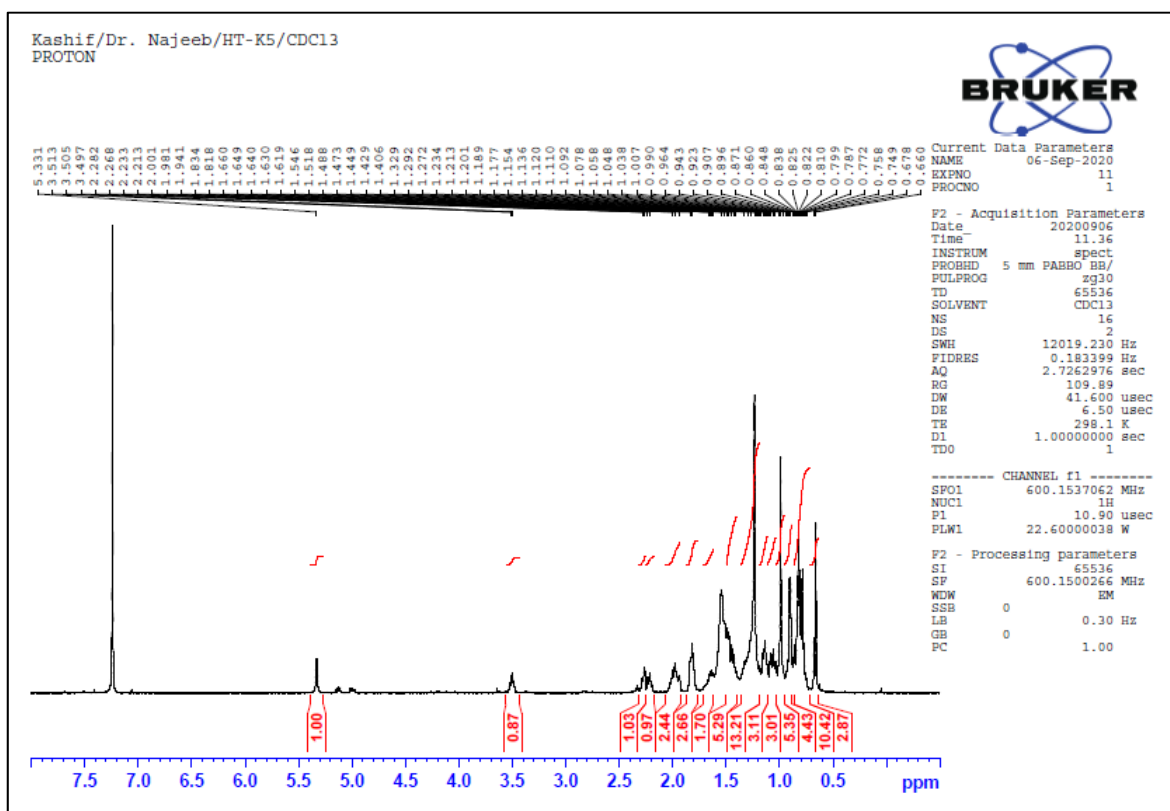

Figure S10: <sup>1</sup>H-NMR of compound BS

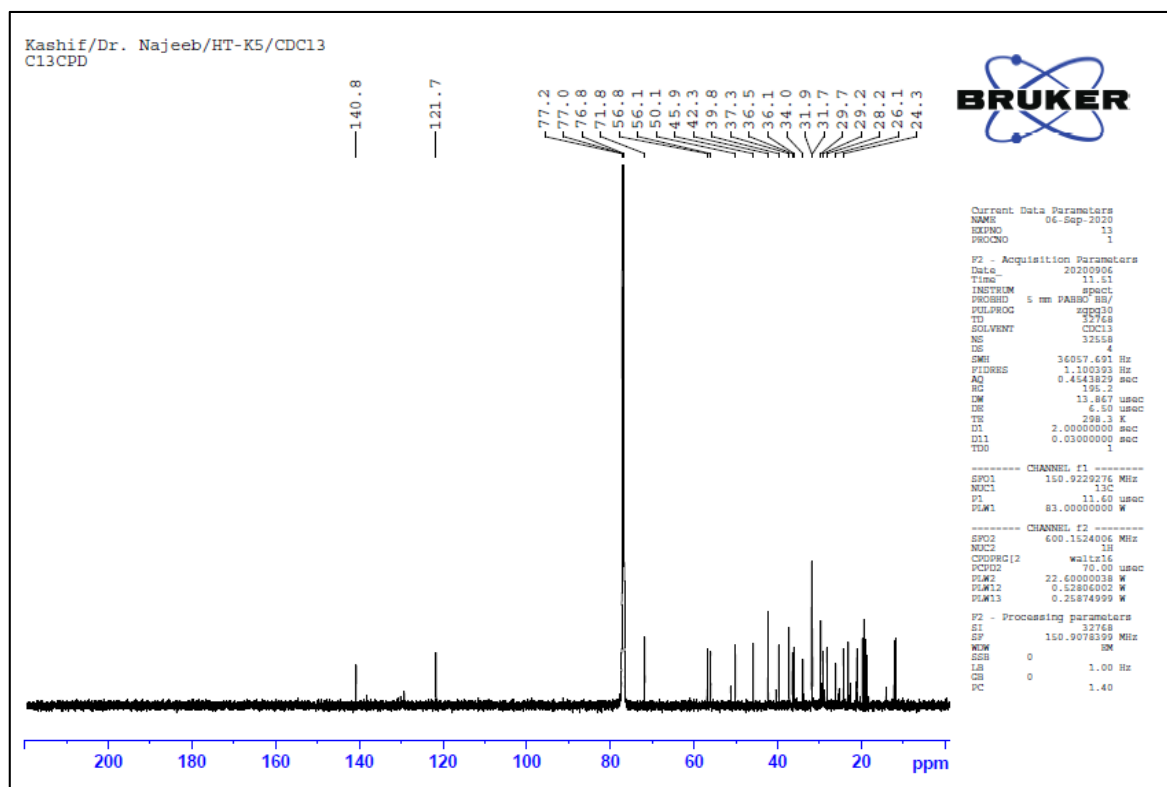

Figure S11:  $^{13}\text{C}$ -NMR of compound **BS**

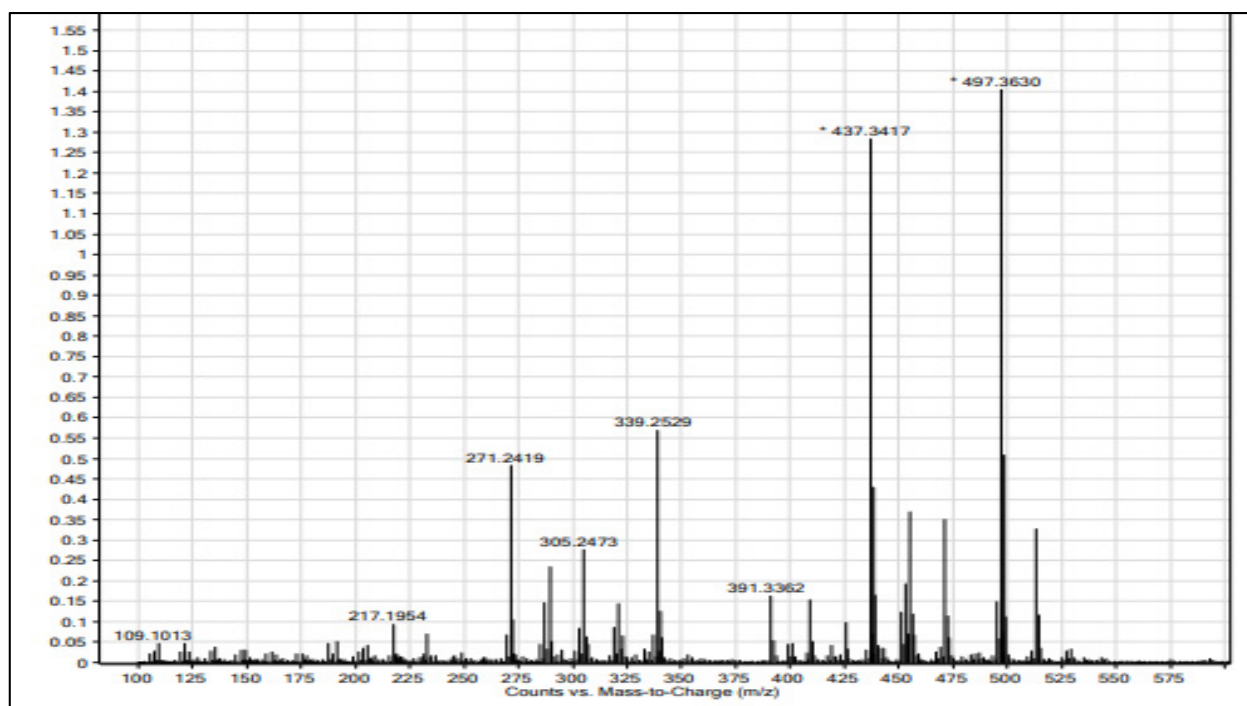

Figure S12: ESI-HRMS of **BS**

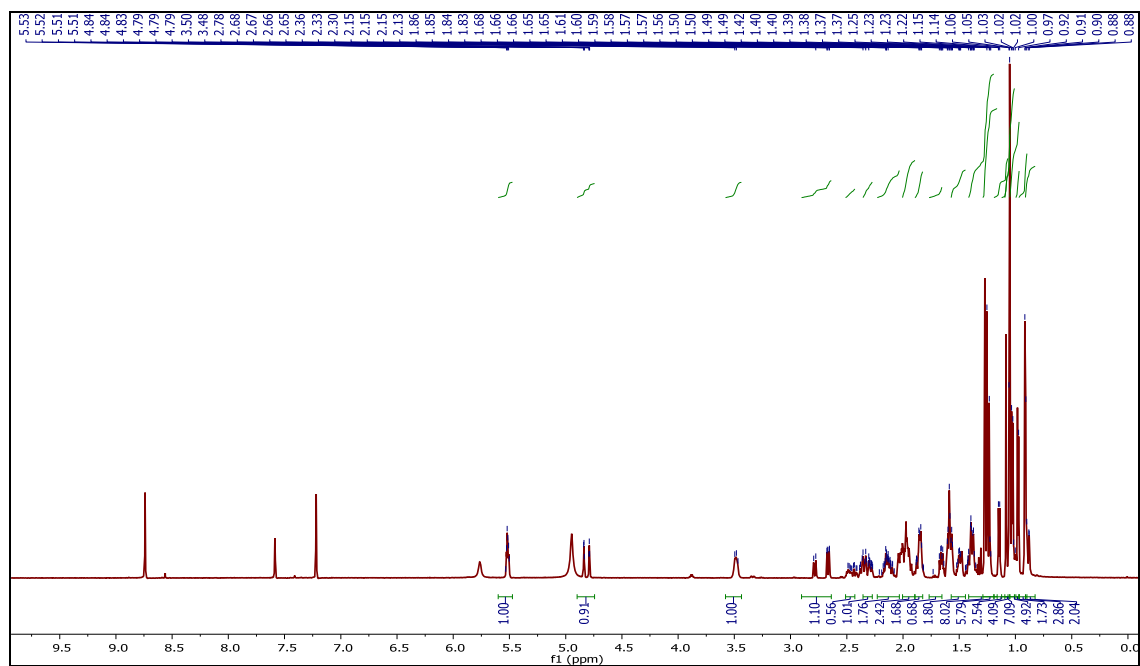

Figure S13:  $^1\text{H}$ -NMR of compound MA

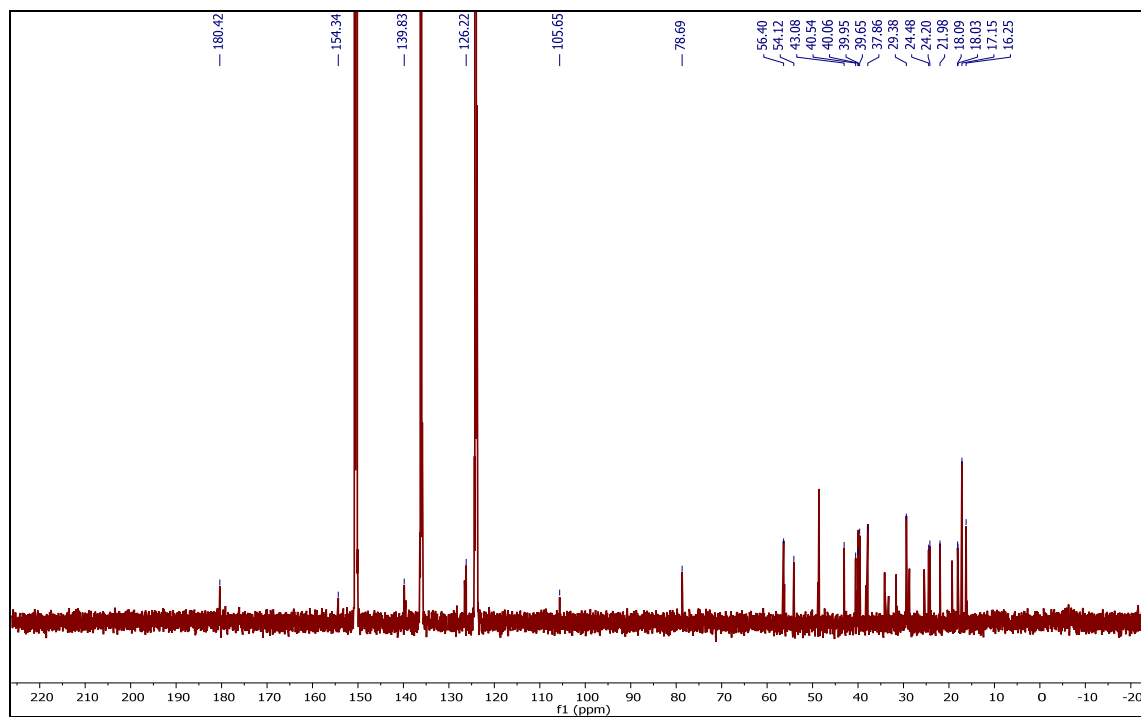

Figure S14:  $^{13}\text{C}$ -NMR of compound MA



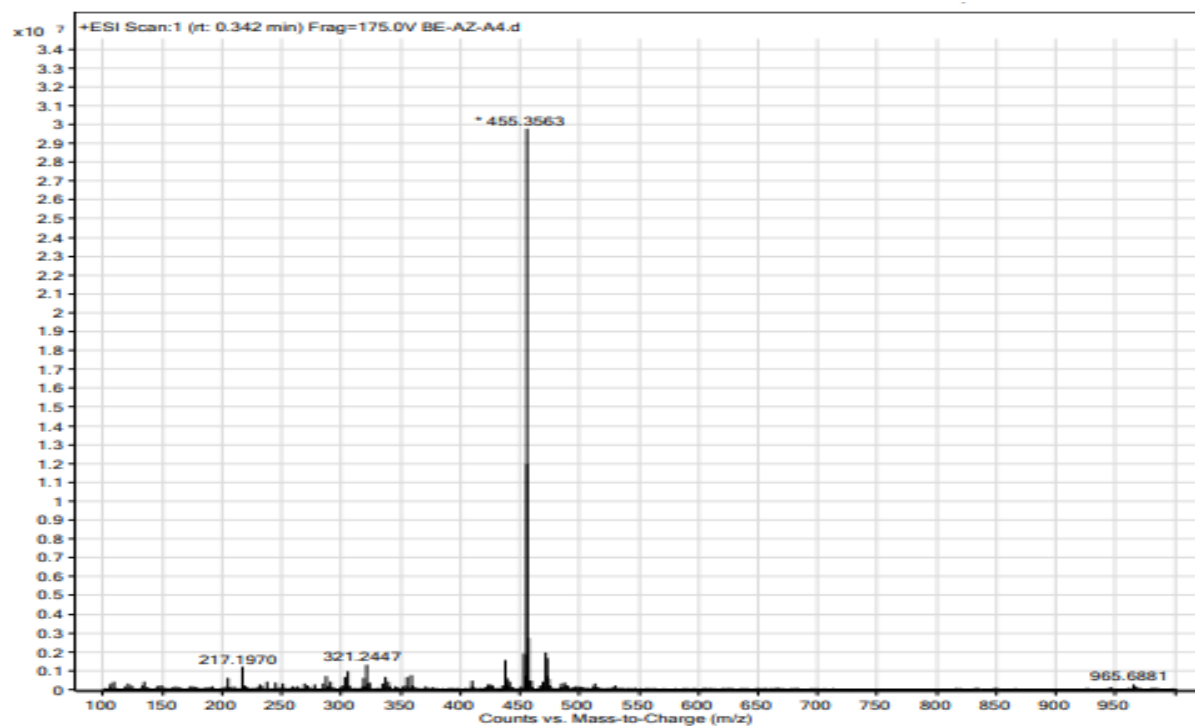

Figure S15: ESI-HRMS of MA

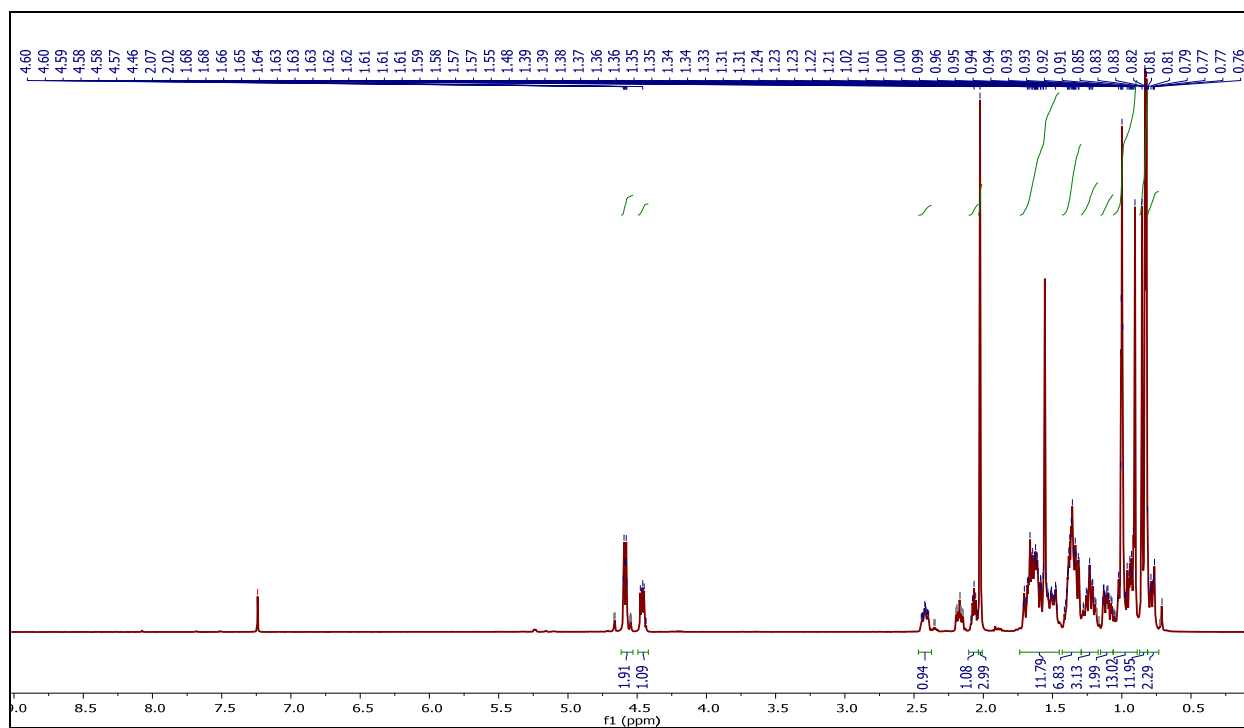

Figure S16:  $^1\text{H}$ -NMR of compound TA

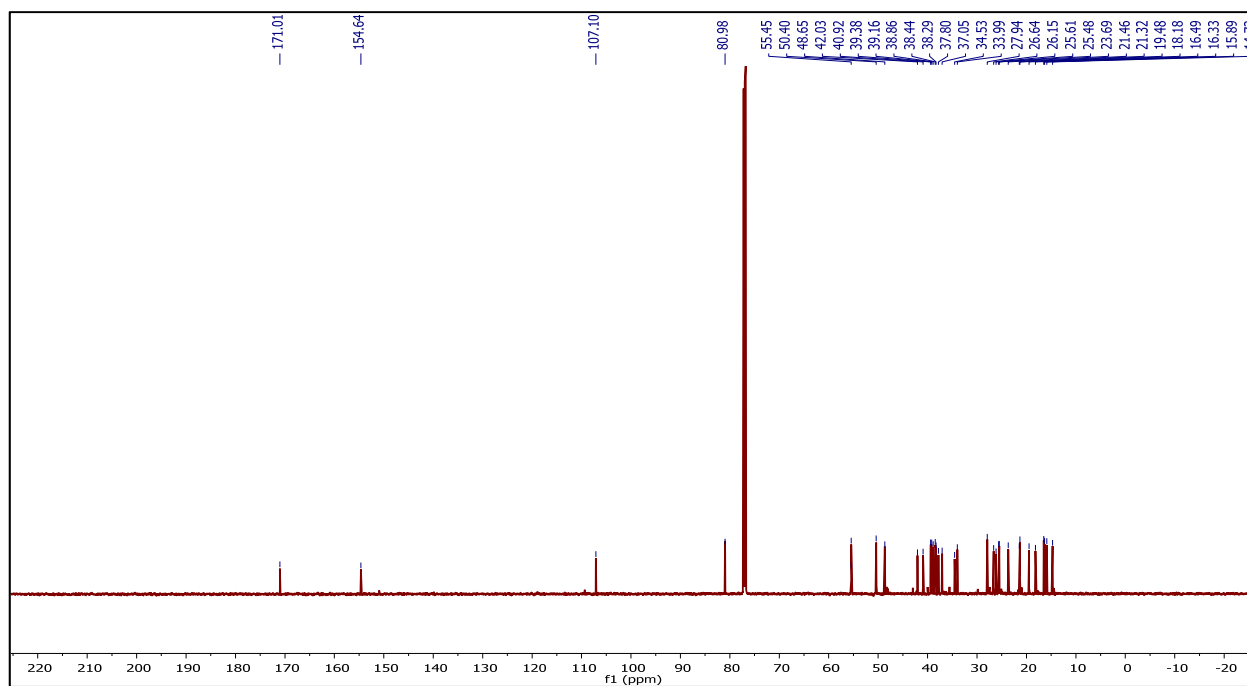

Figure S17: <sup>13</sup>C-NMR of compound TA

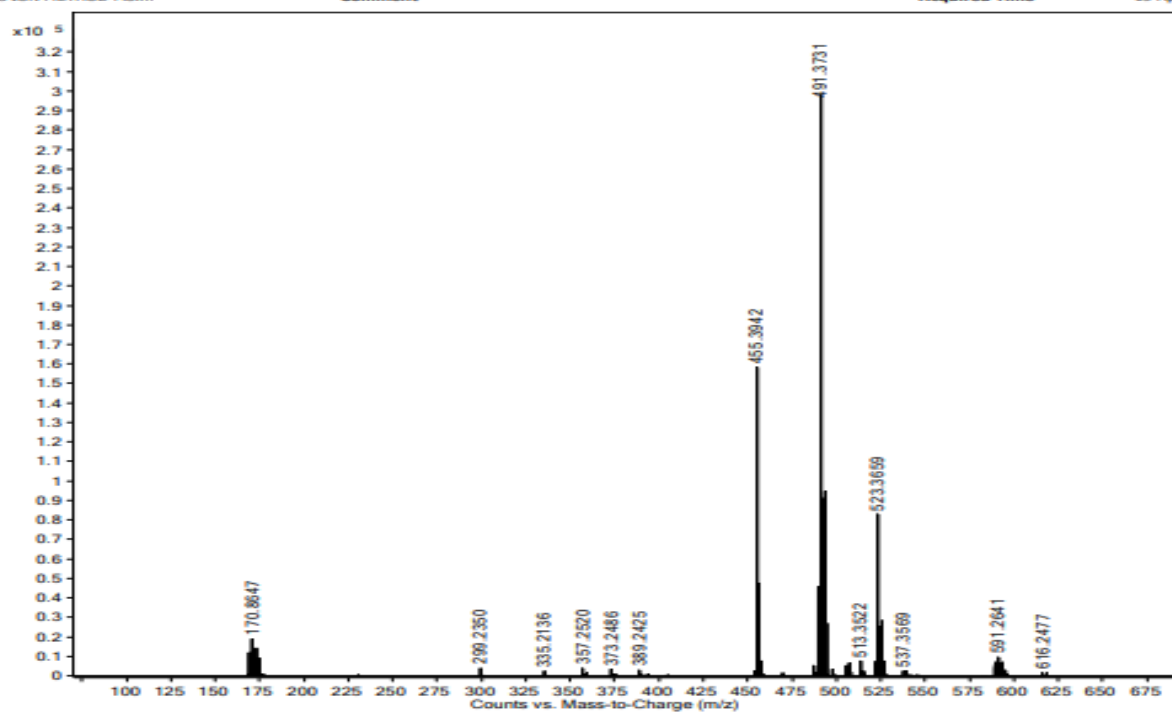

Figure S18: ESI-HRMS of TA

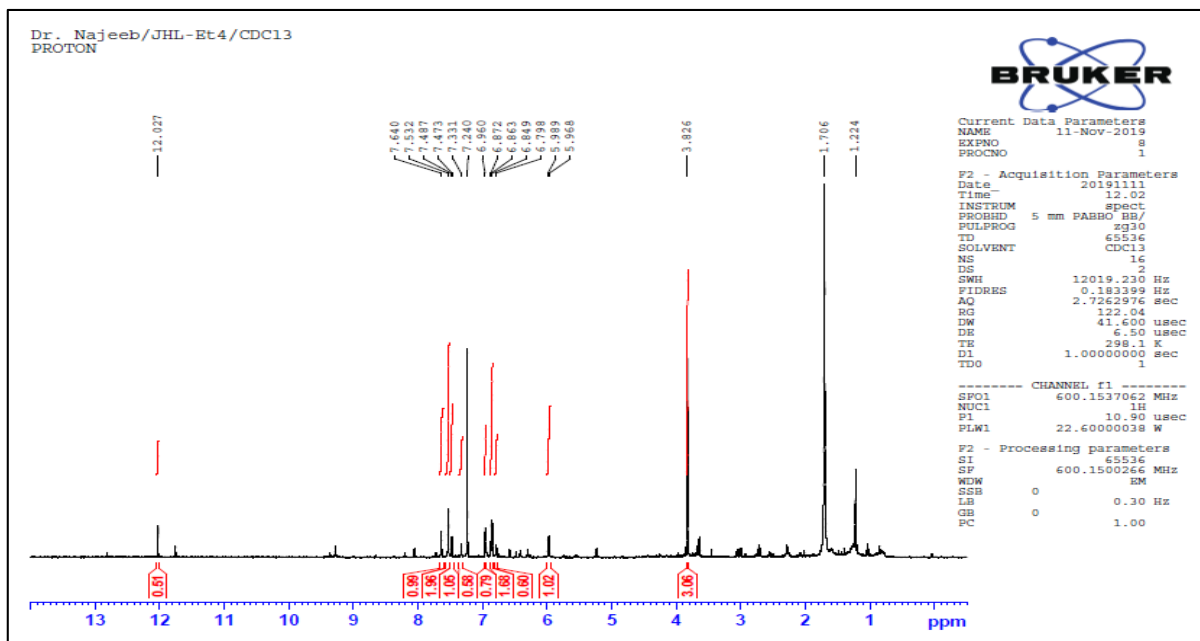

Figure S19:  $^1\text{H}$ -NMR of compound FL-1

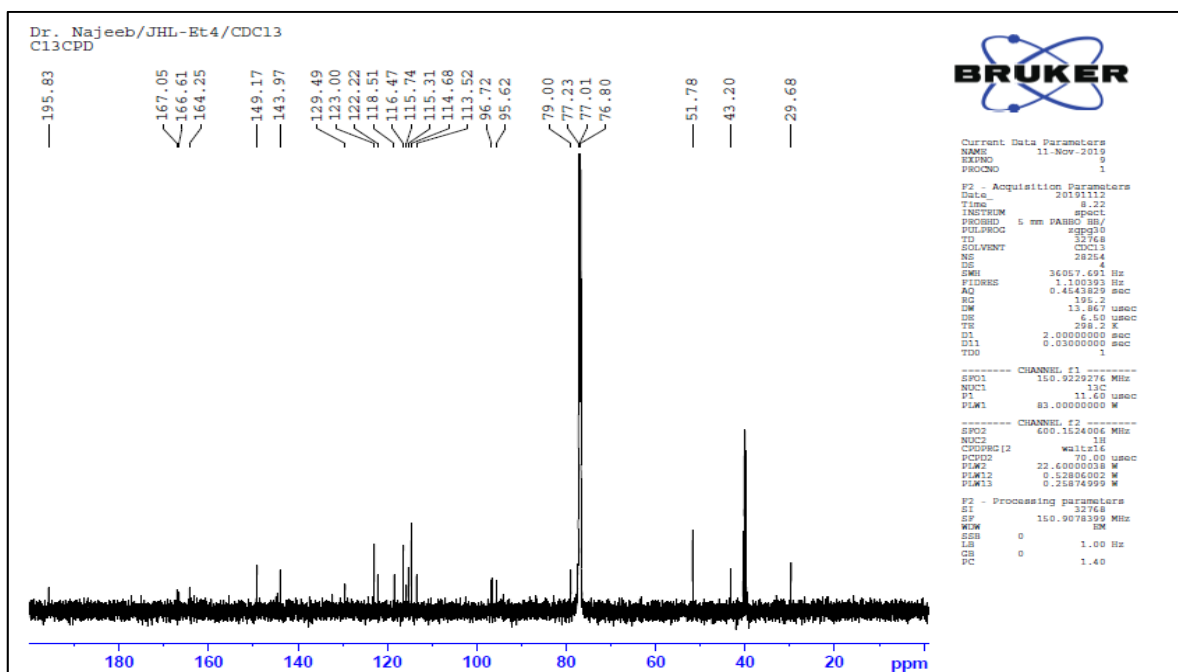

Figure S20:  $^{13}\text{C}$ -NMR of compound FL-1

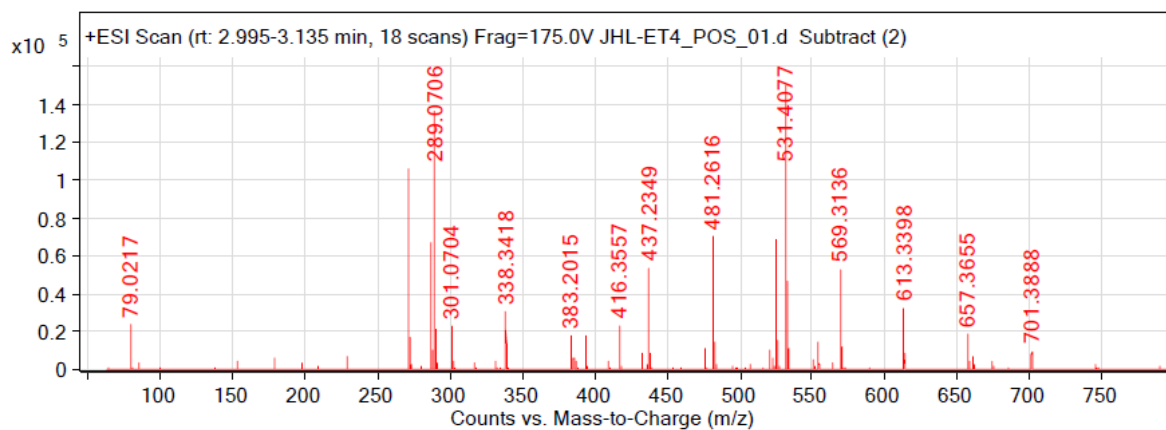

Figure S21: ESI-HRMS of **FL-1**.

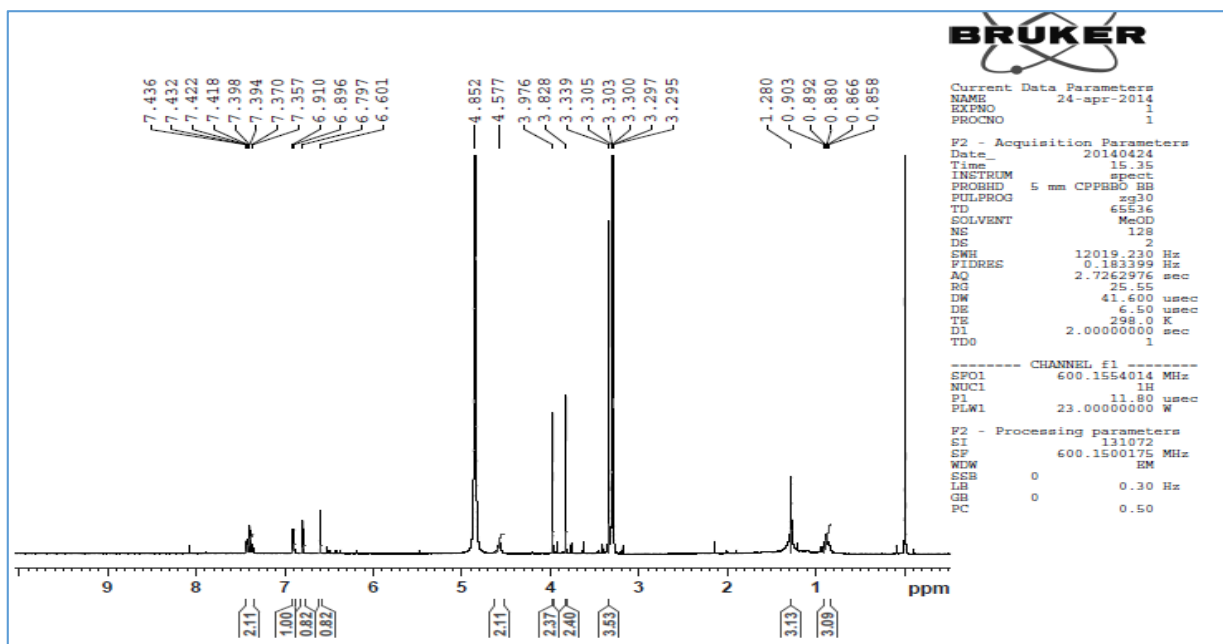

Figure S22:  $^1\text{H}$ -NMR of compound **FL-2**

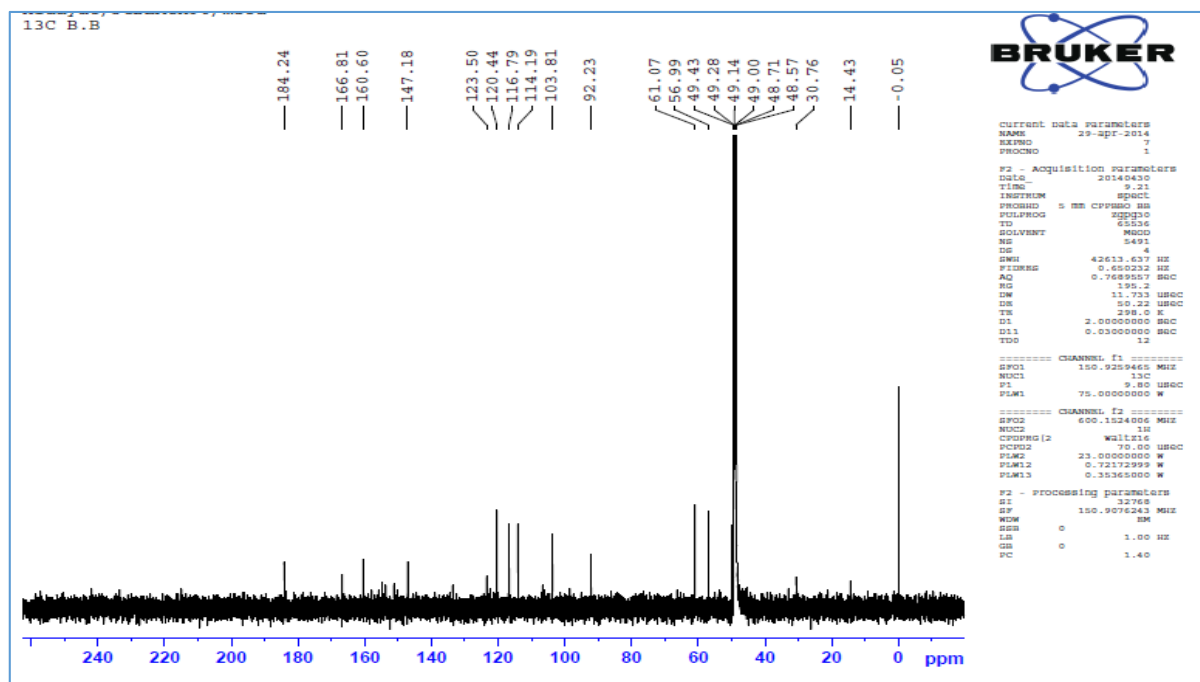

**Figure S23:** <sup>13</sup>C-NMR of compound FL-2

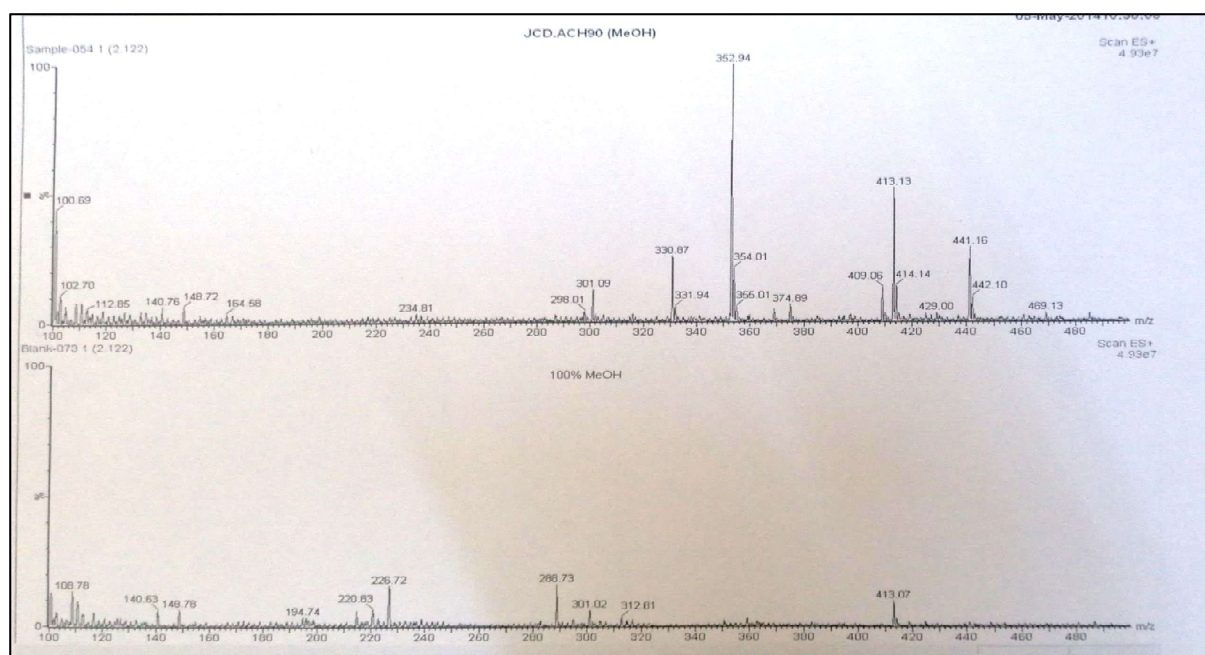

**Figure S24:** ESI-HRMS of FL-2

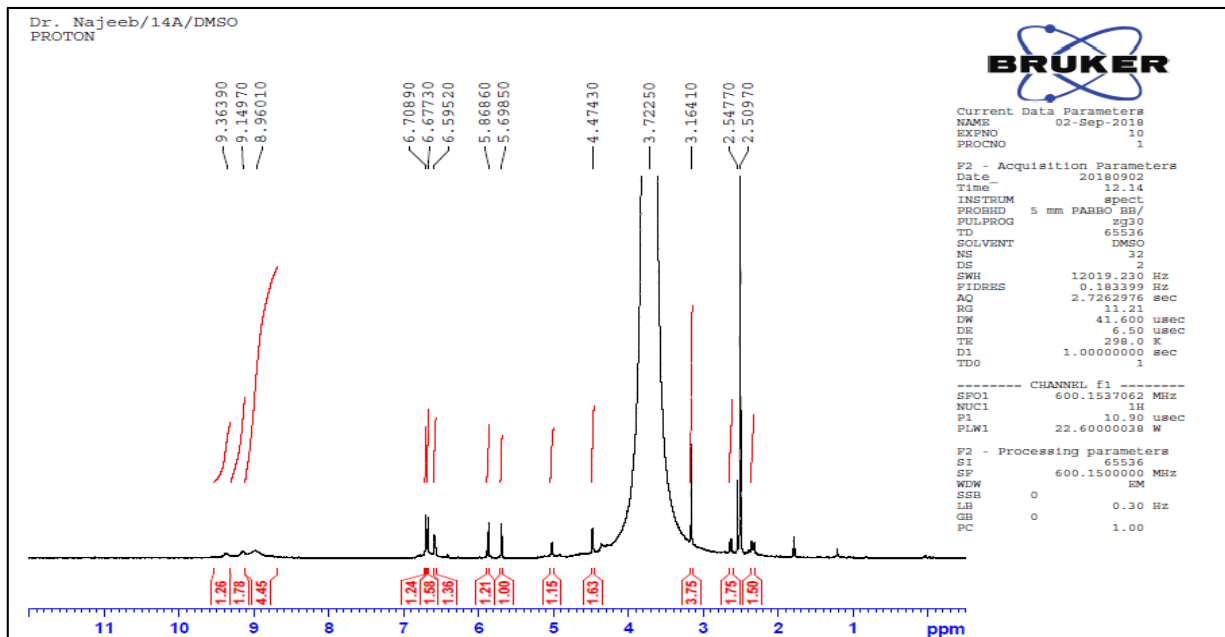

Figure S25:  $^1\text{H}$ -NMR of compound FL-3

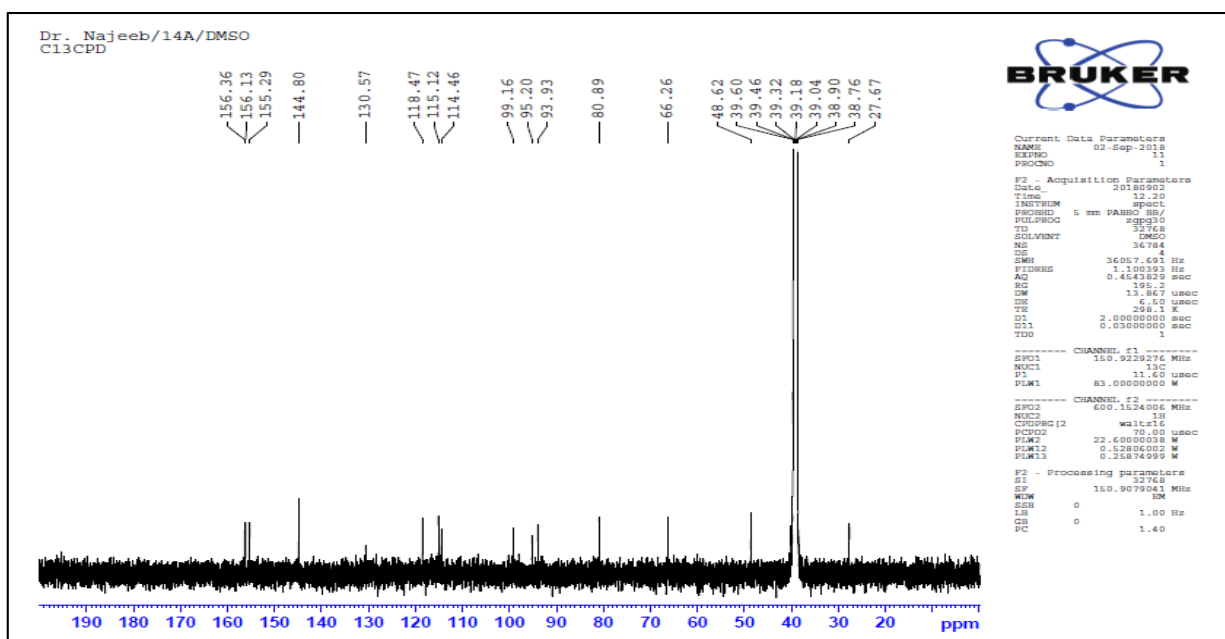

Figure S26:  $^{13}\text{C}$ -NMR of compound FL-3

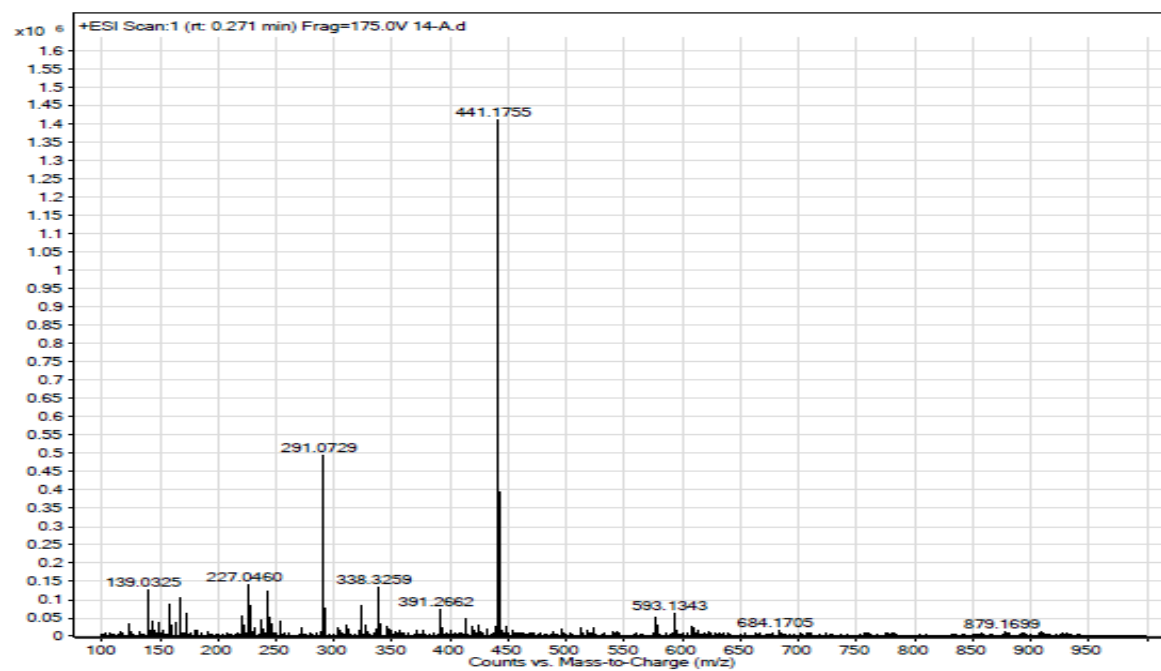

Figure S27: ESI-HRMS of FL-3
